# Supplementary material
Source: Springer Nature journal article supplement (https://www.springermedizin.de/resource/supplementary/12943_2009_454_MOESM1_ESM.pdf/9554298)
Supplement: MOESM1 [file 9554298]

**TABLE S1:** Expression of 250 miRNAs in resistant and responder CML patients.  $\Delta$ cT: cT of miRNA-cT of RNU6B. (RNU6B was used as internal calibrator).

| AB Assay Name  | RESISTANTS       |                  |                 | RESPONDERS       |                  |                  |                  |                 |
|----------------|------------------|------------------|-----------------|------------------|------------------|------------------|------------------|-----------------|
|                | $\Delta$ cT 1158 | $\Delta$ cT 1093 | $\Delta$ cT 691 | $\Delta$ cT 1670 | $\Delta$ cT 1277 | $\Delta$ cT 1402 | $\Delta$ cT 1163 | $\Delta$ cT 580 |
| let7a          | -3.6578          | -7.7402          | -3.6749         | -7.87            | -6.1142          | -5.9813          | -6.9808          | -7.6708         |
| let7b          | -3.2565          | -7.2323          | -3.3563         | -7.41            | -4.4802          | -5.6723          | -6.8625          | -6.3621         |
| let7c          | 1.8229           | -0.7049          | 4.2308          | -2.65            | 0.9093           | -0.3241          | -2.2893          | -0.8646         |
| let7d          | -0.0444          | 11.9978          | 15.404          | -2.47            | -1.7206          | -2.5362          | -4.2572          | -3.8144         |
| let7e          | 7.7853           | -22.7194         | -3.2469         | 2.72             | 5.6746           | 2.8104           | 0.6104           | 2.2375          |
| let7f          | -1.4479          | -5.3128          | -1.519          | -5.15            | -2.6048          | -4.5991          | -5.7045          | -5.1793         |
| let7g          | -3.2257          | -4.6804          | -20.9406        | -6.48            | -4.7666          | -5.9481          | -6.9448          | -14.9345        |
| let7i          | -0.2315          | -1.4066          | 0.4985          | -4.14            | -3.3187          | -1.6379          | -4.7998          | -4.5638         |
| hsa-miR-1      | 8.7509           | 5.8948           | -11.9781        | 2.5              | 6.5736           | 5.2558           | 0.0083           | 1.5192          |
| hsa-miR-7      | 4.7084           | 11.9978          | 7.6511          | 1.29             | 1.9794           | 1.2451           | 0.4672           | 1.8119          |
| hsa-miR-9      | 4.6289           | 1.0629           | 4.6137          | 1.06             | 3.3572           | 2.6003           | 3.4736           | 4.0769          |
| hsa-miR-10a    | 5.3556           | 0.8265           | 6.1015          | -0.44            | 4.6122           | 3.3429           | -1.468           | 2.1587          |
| hsa-miR-10b    | 5.3086           | 3.1462           | 5.0814          | 2.52             | 5.6475           | 4.776            | 0.8311           | 1.4705          |
| hsa-miR-15a    | 0.1398           | -3.8572          | -0.5219         | -3.92            | -2.6091          | -3.165           | -4.1001          | -4.3607         |
| hsa-miR-15b    | -4.1848          | -10.1508         | -8.1988         | -8.14            | -5.6936          | -10.8552         | -9.6498          | -12.5315        |
| hsa-miR-16     | -7.2651          | -10.485          | -4.1009         | -10.8            | -9.7097          | -12.2681         | -10.9989         | -22.9731        |
| hsa-miR-17-3p  | 3.3476           | 2.2757           | 4.893           | 0.67             | 0.4326           | -0.2443          | -0.8652          | -1.0573         |
| hsa-miR-17-5p  | -2.1721          | -3.5384          | 1.0997          | -5.21            | -4.4021          | -4.4424          | -8.7181          | -5.9787         |
| hsa-miR-18a    | -1.0606          | -2.6471          | -10.5612        | -3.48            | -2.2014          | -11.9732         | -4.6244          | -3.1732         |
| hsa-miR-19a    | -2.4581          | -6.535           | -2.1114         | -6.22            | -4.9858          | -5.7065          | -8.9738          | -6.2386         |
| hsa-miR-19b    | -6.2381          | -8.3931          | -8.4577         | -7.66            | -6.8165          | -7.0912          | -9.6546          | -8.2557         |
| hsa-miR-20a    | -4.369           | -11.1765         | -7.4202         | -10.31           | -6.7776          | -6.8852          | -10.8173         | -12.8582        |
| hsa-miR-20b    | -0.2684          | -3.2689          | 0.5759          | -3.34            | -2.0813          | -2.2185          | -4.672           | -3.9987         |
| hsa-miR-21     | -2.8961          | -5.7757          | -2.1651         | -5.53            | -4.4063          | -9.8649          | -9.5867          | -5.7347         |
| hsa-miR-22     | 1.0548           | -11.6977         | 0.8117          | -0.41            | -0.2423          | -1.707           | -3.8277          | -2.9608         |
| hsa-miR-23a    | 0.9352           | 2.9154           | 3.5909          | -2.99            | -2.4956          | -2.4686          | -3.8689          | -2.1111         |
| hsa-miR-23b    | 3.5524           | -0.7996          | 1.4948          | -0.43            | -0.2646          | -1.3497          | -3.2186          | -13.789         |
| hsa-miR-24     | -7.3552          | -8.2663          | -3.4095         | -7.3             | -5.9902          | -8.8954          | -9.1225          | -7.4319         |
| hsa-miR-25     | -4.3224          | -6.9156          | -4.1449         | -5.54            | -5.2021          | -11.483          | -4.7763          | -11.8049        |
| hsa-miR-26a    | -5.2111          | 11.9978          | -4.5276         | -8.99            | -7.3037          | -7.6217          | -11.5725         | -12.2237        |
| hsa-miR-26b    | -13.1355         | -6.1387          | -3.347          | -8.48            | -9.3545          | -12.2785         | -10.4723         | -8.0727         |
| hsa-miR-27a    | -9.5095          | -21.1697         | 15.404          | -6.97            | -6.3371          | -9.8191          | -7.2188          | -7.8591         |
| hsa-miR-27b    | 1.5121           | -3.6372          | 4.105           | -1.78            | -0.9787          | -1.8026          | -3.6076          | -3.8347         |
| hsa-miR-28     | 1.6331           | -1.959           | 1.5902          | -1.48            | -0.3457          | -12.206          | -1.4358          | -1.408          |
| hsa-miR-29a    | -1.0203          | 4.2363           | 15.404          | -4.74            | -4.1372          | -5.2041          | -6.1307          | -5.4215         |
| hsa-miR-29b    | 1.3263           | -2.0648          | 1.1362          | -0.29            | -0.9343          | 0.2168           | -14.5667         | -0.9928         |
| hsa-miR-29c    | 12.7493          | 6.4795           | -0.0389         | -4.03            | -3.316           | -3.9003          | -5.3865          | -4.8419         |
| hsa-miR-30a-3p | 2.9007           | -0.1417          | 2.6049          | -0.44            | 0.6691           | 1.1556           | 0.3214           | 0.096           |
| hsa-miR-30a-5p | -10.6334         | -11.8165         | -3.588          | -5.47            | -4.5402          | -10.7634         | -8.6234          | -11.9483        |
| hsa-miR-30b    | -2.4478          | -3.8857          | 7.6434          | -7.2             | -6.0259          | -11.2833         | -9.2976          | -7.6396         |
| hsa-miR-30c    | -1.0476          | 8.1969           | 15.404          | -6.65            | -9.6782          | -5.0602          | -5.1074          | -4.0084         |
| hsa-miR-30d    | -1.8755          | -6.0871          | -12.2794        | -4.35            | -3.1717          | -11.0978         | -5.6684          | -4.995          |
| hsa-miR-30e-3p | -1.9607          | -0.6131          | -0.9197         | -3.88            | -3.3061          | -2.7647          | -19.2259         | -4.5063         |
| hsa-miR-30e-5p | 0.2651           | -4.2337          | -1.7559         | -2.23            | -0.7165          | -1.4103          | -3.6624          | -5.2425         |
| hsa-miR-31     | 6.5579           | 1.594            | 7.1756          | 0.47             | 3.6999           | 1.5644           | 0.9581           | -0.7975         |
| hsa-miR-32     | 0.6752           | -1.9887          | -10.8365        | -3.28            | -0.9854          | -1.747           | -3.4928          | -3.3293         |
| hsa-miR-33     | 8.636            | 7.5294           | 13.8515         | 6.18             | 5.6179           | 7.6861           | 2.4842           | 3.3746          |
| hsa-miR-34a    | 3.8374           | -14.802          | 7.6061          | 2.35             | 2.7705           | 4.6266           | 0.3283           | 2.3161          |
| hsa-miR-34b    | 8.2165           | 4.2353           | 7.3552          | 5.53             | 6.2321           | 4.9675           | 7.7033           | 7.1317          |
| hsa-miR-34c    | 7.6169           | 5.4579           | 7.8899          | 9.69             | 6.1496           | 4.4709           | 5.6219           | 7.0524          |

|                |          |          |         |         |          |          |          |          |
|----------------|----------|----------|---------|---------|----------|----------|----------|----------|
| hsa-miR-92     | -16.834  | 11.9978  | 6.7762  | -8.52   | -6.4035  | -9.4039  | -9.387   | -7.3954  |
| hsa-miR-93     | -3.9024  | -5.3879  | -3.6654 | -8.52   | -5.4147  | -5.9387  | -7.0716  | -7.1891  |
| hsa-miR-94     | 8.8759   | 5.0684   | 8.268   | 4.78    | 7.277    | 3.2617   | 4.4448   | 2.9905   |
| hsa-miR-96     | 13.9407  | 4.1449   | 9.45    | 5.12    | 7.1011   | 8.2073   | 2.5898   | 2.3961   |
| hsa-miR-98     | 3.0882   | -0.6559  | 3.4046  | -1.7    | 0.3474   | -1.2854  | -3.1415  | -2.3236  |
| hsa-miR-99a    | 2.3958   | 0.1911   | 3.8738  | 0.68    | 1.7458   | 0.9814   | -1.504   | -0.1764  |
| hsa-miR-99b    | 2.6029   | -1.2527  | 3.8546  | 1.17    | 3.0874   | -0.2159  | -2.7808  | -0.8415  |
| hsa-miR-100    | 14.5346  | 11.9978  | 4.7073  | 0.19    | 1.904    | 1.2985   | -1.5874  | -0.7794  |
| hsa-miR-101    | -11.0344 | -3.5965  | 1.5899  | -3.42   | -3.0385  | -2.0649  | -4.9265  | -4.1122  |
| hsa-miR-103    | -2.7835  | -5.6051  | -3.4123 | -5.29   | -4.4099  | -5.4138  | -6.4978  | -5.8165  |
| hsa-miR-106a   | -9.7473  | -5.4004  | -6.9683 | -6.27   | -4.3909  | -3.9158  | -8.6291  | -5.7053  |
| hsa-miR-106b   | -3.3032  | -11.1353 | -4.3053 | -6.34   | -4.38    | -4.6942  | -6.5962  | -6.8538  |
| hsa-miR-107    | 4.2841   | -0.3051  | 1.5456  | 0.23    | 0.9656   | 0.4813   | -1.8774  | -0.9911  |
| hsa-miR-122a   | 14.5346  | 11.9978  | 15.404  | 11.41   | 9.3648   | 12.956   | 10.9907  | 12.5407  |
| hsa-miR-124a   | 14.5346  | 11.9978  | 9.9555  | 11.41   | 10.6235  | 12.956   | 12.3404  | 9.1946   |
| hsa-miR-125a   | -1.4478  | -5.9099  | 0.1783  | -3.47   | -1.0081  | -3.7436  | -9.0308  | -3.9995  |
| hsa-miR-125b   | 1.5802   | -0.9353  | 2.4517  | -0.93   | 0.7888   | -0.4966  | -2.4937  | -1.1606  |
| hsa-miR-126#   | 14.5346  | 9.2603   | 14.37   | -3.53   | -1.4415  | -2.752   | -4.3252  | -0.1514  |
| hsa-miR-127    | 7.7275   | 4.1737   | 5.4111  | 2.94    | 3.9533   | 0.3972   | 0.6047   | 3.1183   |
| hsa-miR-128a   | 8.0966   | 6.2006   | 8.4222  | 4.26    | 6.4758   | 5.1438   | 3.0887   | 4.0964   |
| hsa-miR-128b   | 14.5346  | 11.9978  | 9.6101  | 6.18    | 6.0178   | 7.956    | 6.7689   | 6.4918   |
| hsa-miR-129    | 12.8981  | 11.0233  | 15.404  | 11.41   | 13.4642  | 12.956   | 5.2214   | 10.4794  |
| hsa-miR-130a   | 1.8704   | -0.5836  | 3.0791  | -2.85   | -1.2921  | -2.0075  | -5.1698  | -2.8242  |
| hsa-miR-130b   | 1.7826   | -1.8974  | 2.2034  | -1.2    | -0.8939  | -1.9496  | -4.0032  | -2.6064  |
| hsa-miR-132    | 4.7647   | 1.8051   | 6.5074  | -0.41   | 1.3164   | 0.2863   | -0.5852  | -0.2947  |
| hsa-miR-133a   | 8.0143   | 2.8826   | 7.5327  | 3.83    | 6.445    | 4.6264   | 0.4909   | 1.4865   |
| hsa-miR-133b   | 11.5346  | -1.0651  | 11.404  | 1.43    | 2.8754   | 3.2636   | -0.8627  | -0.1271  |
| hsa-miR-134    | 9.4357   | 9.7279   | 10.3037 | 4.83    | 6.8821   | 3.0083   | 1.8297   | 4.7141   |
| hsa-miR-135a   | 5.6385   | 3.644    | 7.8707  | 5.14    | 3.3382   | 3.182    | -0.457   | 3.2583   |
| hsa-miR-135b   | -12.0978 | 7.0406   | 13.0784 | 5.87    | 6.2877   | 4.8971   | 3.0029   | 4.8995   |
| hsa-miR-137    | 14.5346  | 11.9978  | 15.404  | 11.41   | 11.7235  | 10.9024  | 8.3404   | 7.1798   |
| hsa-miR-138    | 11.7823  | 10.2128  | 9.1732  | 7.41    | 9.4642   | 6.2972   | 10.8974  | 8.5407   |
| hsa-miR-139    | 7.6756   | 7.9978   | 6.4226  | 4.07    | 5.8087   | 2.1182   | 0.4398   | 3.3013   |
| hsa-miR-140    | -2.4182  | -5.8385  | -2.4535 | -6.28   | -4.2538  | -4.6114  | -5.064   | -4.9663  |
| hsa-miR-141    | 7.0329   | 6.6861   | 7.4162  | 2.66    | 3.9151   | 4.0083   | 2.2764   | 1.0371   |
| hsa-miR-142-3p | -8.4557  | -9.4484  | -8.2303 | -11.46  | -10.311  | -12.4164 | -11.1714 | -15.4334 |
| hsa-miR-142-5p | -4.9546  | -7.7587  | -6.0406 | -7.79   | -10.2418 | -19.082  | -14.5426 | -8.1026  |
| hsa-miR-143    | -0.275   | -2.1537  | -0.4621 | -1.12   | -0.9297  | -1.0287  | 0.3648   | -1.8893  |
| hsa-miR-145    | -1.8972  | -4.2815  | -1.9431 | -4.84   | -3.2556  | -3.0467  | -2.1211  | -3.5709  |
| hsa-miR-146a   | 0.52     | -4.5721  | 1.4763  | -4.67   | -2.3966  | -5.1355  | -8.7945  | -5.6213  |
| hsa-miR-146b   | -2.5847  | -6.0846  | -2.4375 | -5.21   | -4.1868  | -5.1397  | -7.556   | -6.1509  |
| hsa-miR-147    | 14.5346  | 11.9978  | 14.7792 | 11.41   | 11.4992  | 12.956   | 12.3404  | 12.1321  |
| hsa-miR-148a   | -2.3658  | -3.9066  | -1.6581 | -4.4707 | -2.6184  | -3.0413  | -3.306   | -2.4225  |
| hsa-miR-148b   | 0.5762   | -2.3867  | 0.0797  | -1.3647 | 0.585    | -1.2324  | -3.8653  | -1.7391  |
| hsa-miR-149    | 11.5442  | 9.0731   | 9.7944  | 11.0457 | 7.7292   | 8.3006   | 5.9465   | 8.2257   |
| hsa-miR-150    | 9.3183   | -3.4775  | -0.4952 | -6.3485 | -2.3151  | -5.577   | -7.4687  | -7.1992  |
| hsa-miR-151    | 4.8724   | 4.1054   | 5.868   | 0.5567  | 3.1138   | 0.0033   | -4.2539  | -1.009   |
| hsa-miR-152    | 4.1128   | 0.0276   | 4.8428  | 2.4981  | 3.5611   | 0.9525   | -2.8183  | 0.247    |
| hsa-miR-153    | 14.5442  | 13.0731  | 15.5392 | 11.9002 | 14.4568  | 13.928   | 5.5096   | 5.4551   |
| hsa-miR-154    | 14.5442  | 13.0731  | 15.5392 | 11.9002 | 15.3096  | 5.1626   | 4.8502   | 12.4522  |
| hsa-miR-155    | 5.8957   | 0.243    | 2.9037  | -3.0634 | -0.2823  | -1.0178  | -5.0854  | -1.8028  |
| hsa-miR-181a   | -2.1446  | -4.2939  | -7.649  | -1.3095 | -0.6656  | -1.0772  | -3.1453  | -3.3965  |
| hsa-miR-181b   | -9.1935  | -3.4574  | -1.0287 | -3.8039 | -0.1664  | -2.7924  | -4.0699  | -3.1209  |
| hsa-miR-181c   | 1.5117   | -0.6908  | 2.0982  | 1.0707  | 2.9224   | 1.2332   | -0.2553  | -0.5485  |
| hsa-miR-181d   | -1.1545  | -4.121   | -1.1854 | -4.475  | -1.4398  | -1.6978  | -4.8709  | -3.8162  |
| hsa-miR-182    | 4.4179   | 3.5818   | 3.7049  | 0.1972  | 2.8779   | 2.4311   | -2.608   | -1.2648  |

|                |          |          |          |          |          |          |          |          |
|----------------|----------|----------|----------|----------|----------|----------|----------|----------|
| hsa-miR-183    | 14.5442  | 11.0431  | 13.7179  | 4.7361   | 7.1455   | 8.3714   | 1.7781   | 3.1266   |
| hsa-miR-184    | 14.5442  | 11.5556  | 15.5392  | 11.9002  | 9.983    | 13.928   | 11.6474  | 12.4522  |
| hsa-miR-186    | -7.7031  | -4.3442  | -1.5005  | -5.8305  | -2.2034  | -2.8753  | -5.8086  | -3.9942  |
| hsa-miR-187    | 13.3583  | 8.1004   | 10.4023  | 6.8268   | 12.3863  | 8.4521   | 5.0602   | 5.7977   |
| hsa-miR-188    | 6.9854   | 9.006    | 8.8042   | 4.9457   | 5.9801   | 5.9289   | 3.7752   | 3.8387   |
| hsa-miR-190    | 8.5794   | 7.1412   | 8.8575   | 4.3006   | 6.7265   | 5.7658   | 0.8698   | 3.1924   |
| hsa-miR-191    | -10.5123 | -7.1195  | -8.5742  | -3.2031  | -1.1388  | -1.1425  | -4.2191  | -1.2546  |
| hsa-miR-192    | 9.9178   | 1.546    | 6.1504   | -1.9777  | 1.0387   | 0.8639   | -1.6434  | -0.4445  |
| hsa-miR-193a   | 4.0261   | 2.0883   | 1.469    | 1.2754   | 3.3709   | 1.2228   | 1.0588   | 0.0975   |
| hsa-miR-193b   | 14.5442  | 7.0782   | 10.7566  | 6.0318   | 12.7127  | 13.928   | 7.6474   | 5.7152   |
| hsa-miR-194    | 0.6525   | -0.7859  | -0.9799  | -0.367   | -0.4419  | 0.4649   | -17.1376 | -1.3399  |
| hsa-miR-195    | 1.0891   | -2.2108  | 0.0543   | -2.9342  | -1.8357  | -2.9342  | -5.277   | -3.451   |
| hsa-miR-196a   | 5.5036   | 5.1508   | 6.962    | 1.5352   | 3.327    | 3.8011   | 0.1341   | 1.806    |
| hsa-miR-196b   | 6.1815   | 4.7048   | 6.9179   | -1.1493  | 1.0184   | 2.7794   | -1.7228  | -0.696   |
| hsa-miR-197    | -1.5764  | -3.7902  | -0.9655  | -3.0157  | -1.0822  | -1.5369  | -2.8005  | -2.4668  |
| hsa-miR-198    | 5.4511   | 8.429    | 6.2708   | 4.6458   | 7.2588   | 9.3154   | 9.2475   | 4.9054   |
| hsa-miR-199a   | 14.5442  | 13.0731  | 10.0157  | 4.3913   | 7.68     | 2.3849   | -0.2791  | 2.2735   |
| hsa-miR-199b   | 1.4392   | -1.6865  | 0.1885   | -0.2891  | 2.0066   | 0.6864   | 0.2043   | -0.6868  |
| hsa-miR-200a#  | 12.4309  | 13.0731  | 10.9432  | 5.4476   | 9.7896   | 9.6461   | 7.5593   | 11.4889  |
| hsa-miR-200c   | 2.4966   | 3.0979   | 3.7923   | 0.7708   | 3.3283   | 2.02     | -0.7517  | -0.4433  |
| hsa-miR-202#   | 13.0288  | 10.2543  | 10.1218  | 11.9002  | 9.4391   | 12.6901  | 6.5836   | 0.8988   |
| hsa-miR-203    | 7.7663   | 13.0731  | 9.9473   | 6.1685   | 9.2215   | 9.928    | 4.7828   | 5.8433   |
| hsa-miR-204    | 7.9666   | 8.2111   | 10.5828  | 4.9808   | 9.1218   | 9.8611   | 4.4833   | 6.6988   |
| hsa-miR-205    | 14.5442  | 13.0731  | 15.5392  | 11.9002  | 15.3096  | 13.928   | 11.6474  | 12.4522  |
| hsa-miR-206    | 7.0391   | 7.1842   | 7.211    | 9.2504   | 6.384    | 5.937    | 5.9591   | 5.1673   |
| hsa-miR-208    | 12.6765  | 13.0731  | -11.4817 | 11.9002  | 11.3096  | 10.2042  | 11.6474  | 12.4522  |
| hsa-miR-210    | 3.5169   | -13.6855 | 2.7517   | 2.019    | 4.9381   | 2.5967   | -1.189   | 1.4996   |
| hsa-miR-211    | 14.5442  | 13.0731  | 15.5392  | 7.4358   | 8.7714   | 12.2477  | 11.6474  | 11.2735  |
| hsa-miR-212    | 6.1186   | 13.0731  | 9.3499   | 4.153    | 4.4267   | 4.5121   | 3.2512   | 3.4042   |
| hsa-miR-213    | 3.0647   | 1.1968   | 4.3445   | -0.2279  | 3.4104   | 1.3179   | 0.3837   | 0.6091   |
| hsa-miR-214    | 4.5575   | 6.5374   | 4.51     | 0.0893   | 3.9765   | 7.5102   | 6.3893   | 2.097    |
| hsa-miR-215    | 4.9893   | 5.2937   | 4.5572   | 6.0636   | 5.519    | 6.2266   | 3.5432   | 3.5706   |
| hsa-miR-216    | 12.8561  | 13.0731  | 11.02    | 6.196    | 8.7811   | 10.1361  | 11.6474  | 5.986    |
| hsa-miR-217    | 14.5442  | 13.0731  | 15.5392  | 11.9002  | 11.5632  | 13.928   | 11.6474  | 9.9382   |
| hsa-miR-218    | 5.6518   | 5.5313   | 6.5849   | 3.118    | 6.626    | 7.7113   | 4.8887   | 4.7201   |
| hsa-miR-219    | 9.1413   | 13.0731  | 10.0457  | 11.9002  | 10.431   | 7.0801   | 5.1083   | 8.3831   |
| hsa-miR-220    | -20.0281 | 13.0731  | 10.8952  | 11.9002  | 15.3096  | 13.928   | -7.4916  | 12.4522  |
| hsa-miR-221    | -3.3364  | -11.874  | -2.9128  | -7.109   | -2.8123  | -4.9636  | -8.9432  | -5.0644  |
| hsa-miR-222    | -3.5418  | -6.9756  | -3.588   | -7.5462  | -2.1904  | -4.7474  | -7.129   | -4.893   |
| hsa-miR-223    | -13.1209 | 13.0731  | -11.8319 | -14.5602 | -11.4954 | -13.8162 | -13.2107 | -11.1404 |
| hsa-miR-224    | 8.083    | 13.0731  | 8.3771   | 4.2982   | 5.6727   | 5.1562   | 4.0026   | 2.7711   |
| hsa-miR-296    | 5.7739   | 6.081    | 4.0736   | 2.6409   | 4.5223   | 2.4828   | -0.294   | 2.1577   |
| hsa-miR-299-5p | 14.5442  | 13.0731  | 15.5392  | 7.9002   | 15.3096  | 6.2035   | 3.8717   | 8.4522   |
| hsa-miR-301    | 0.5043   | -2.7342  | 0.2327   | -2.6384  | 0.6695   | -1.4006  | -4.3073  | -1.5424  |
| hsa-miR-302a#  | 14.5442  | 13.0731  | 15.5392  | 11.9002  | 15.3096  | 13.928   | 11.6474  | 12.4522  |
| hsa-miR-302b#  | 12.1715  | 13.0731  | 15.339   | 11.9002  | 11.9097  | 13.8375  | 11.6474  | 12.4522  |
| hsa-miR-302c#  | 14.5442  | 13.0731  | 15.5392  | 11.9002  | 13.5787  | 13.928   | 11.315   | 12.4522  |
| hsa-miR-302d   | 14.5442  | 13.0731  | -21.0151 | 11.9002  | 12.276   | 13.928   | 11.6474  | 12.4522  |
| hsa-miR-320    | -2.9748  | -2.6584  | -2.1556  | -5.5046  | -2.9122  | -3.7731  | -5.8105  | -5.1274  |
| hsa-miR-323    | 14.5442  | 13.0731  | 12.7731  | 9.363    | 12.0733  | 5.2776   | 3.4657   | 7.1641   |
| hsa-miR-324-3p | -14.4613 | 4.9867   | -7.3711  | -1.2355  | 0.3888   | 1.0009   | -3.3167  | -1.4419  |
| hsa-miR-324-5p | 2.013    | 1.2813   | 2.8933   | -1.6943  | 1.6148   | 1.4343   | -2.9799  | -0.1441  |
| hsa-miR-325    | 14.5442  | 13.0731  | 15.3598  | 11.9002  | 13.3505  | 13.928   | 11.6474  | 12.4522  |
| hsa-miR-326    | 14.5442  | 13.0731  | 9.6641   | 3.2555   | 5.4026   | 2.9147   | -0.0639  | 1.9071   |
| hsa-miR-328    | 3.7611   | 2.5434   | 0.4522   | -1.1413  | 1.6701   | -1.2891  | -3.009   | -0.4162  |
| hsa-miR-330    | 3.2887   | 2.886    | 6.7629   | 3.0905   | 5.3474   | 2.8003   | 0.971    | 3.8722   |

|                |          |          |         |          |          |          |          |          |
|----------------|----------|----------|---------|----------|----------|----------|----------|----------|
| hsa-miR-331    | 0.9748   | -2.2817  | 0.305   | -3.3709  | 1.3713   | -0.5447  | -9.4621  | -1.9459  |
| hsa-miR-335    | 1.7909   | -0.8351  | 2.0826  | -2.0515  | 1.5146   | 0.3686   | -3.6843  | -1.0939  |
| hsa-miR-337    | 14.5442  | 13.0731  | 15.5392 | 11.9002  | 15.3096  | 8.1354   | 6.1492   | 12.4522  |
| hsa-miR-338    | 1.9907   | 13.0731  | 0.6103  | 0.8067   | 2.0346   | 0.9365   | -1.0712  | 0.0772   |
| hsa-miR-339    | 1.2509   | -1.7239  | 0.8841  | -1.0593  | 2.1095   | -0.265   | -3.0764  | -1.7286  |
| hsa-miR-340    | 3.0842   | 1.3051   | 2.2901  | -0.9341  | 1.5858   | 0.8611   | -2.2665  | -0.2347  |
| hsa-miR-342    | 0.1432   | -2.4624  | -0.3429 | -3.2157  | 0.5859   | -2.7582  | -3.1122  | -2.972   |
| hsa-miR-345    | -9.4532  | 13.0731  | -0.3664 | -3.7881  | -1.1257  | -1.7334  | -2.7626  | -2.9673  |
| hsa-miR-346    | 7.5362   | 13.0731  | 8.1838  | 11.9002  | 5.1184   | 5.742    | 6.3044   | 5.4274   |
| hsa-miR-361    | -0.8233  | -13.2668 | -9.2543 | -1.8642  | -0.2093  | -1.1311  | -2.7194  | -1.6524  |
| hsa-miR-365    | 1.445    | -1.0411  | 0.0553  | -3.4772  | -0.1576  | -1.0269  | -0.3419  | -0.0149  |
| hsa-miR-367    | 14.5442  | 13.0731  | 15.5392 | 11.9002  | -15.7351 | 13.928   | 11.6474  | 12.4522  |
| hsa-miR-368    | 14.5442  | 13.0731  | 15.5392 | 11.9002  | 15.3096  | 7.422    | 6.3231   | 12.4522  |
| hsa-miR-369-3p | 14.5442  | 13.0731  | 15.5392 | 11.9002  | 15.3096  | 6.6944   | 3.4091   | 7.0666   |
| hsa-miR-369-5p | 14.5442  | 13.0731  | 15.5392 | 7.2149   | 15.3096  | 5.6273   | 5.0333   | 12.4522  |
| hsa-miR-370    | 14.5442  | 4.7251   | 6.5392  | 9.4959   | 5.4517   | 2.6521   | 2.3527   | 2.6695   |
| hsa-miR-371    | 13.3321  | 13.0731  | 13.3792 | 11.9002  | 11.11    | 13.4132  | 9.668    | 12.4522  |
| hsa-miR-372    | 12.8434  | 13.0731  | 15.5392 | 11.9002  | 15.3096  | 13.928   | 11.6474  | 12.4522  |
| hsa-miR-373#   | 14.5442  | 13.0731  | 12.8776 | 11.9002  | 7.5092   | 12.4631  | 11.6474  | 12.4522  |
| hsa-miR-374    | -1.7193  | -3.798   | -1.565  | -4.7459  | -2.5729  | -3.4194  | -6.1834  | -3.9183  |
| hsa-miR-375    | 6.9281   | 13.0731  | 9.3535  | 8.9258   | 7.1963   | 8.3772   | 6.7436   | 4.8426   |
| hsa-miR-376a   | 6.5034   | 8.3044   | 8.0398  | 6.1565   | 6.4424   | 2.1653   | 0.0272   | 4.7366   |
| hsa-miR-378    | -12.0311 | 2.451    | 3.5731  | -1.632   | 1.9535   | 0.5495   | -0.241   | -0.9755  |
| hsa-miR-379    | 12.1762  | 13.7639  | 15.4059 | 5.9253   | 11.0784  | 3.3864   | 2.7589   | 5.5814   |
| hsa-miR-380-3p | 13.8948  | 13.7639  | 15.4059 | 11.8328  | 11.3384  | 9.9238   | 8.5597   | 7.1951   |
| hsa-miR-381    | 5.0106   | 13.7639  | 11.9699 | 4.1662   | 8.5515   | -20.2104 | 5.8244   | 5.0142   |
| hsa-miR-382    | 13.6257  | 13.7639  | 9.1835  | 3.3135   | 10.9774  | 2.2278   | 0.9874   | 2.3445   |
| hsa-miR-383    | 6.9914   | 9.2017   | 9.3348  | 5.9829   | 8.2871   | 7.8097   | 5.6537   | 5.4966   |
| hsa-miR-409-5p | 13.8948  | -20.8606 | 15.4059 | 11.8328  | 15.5098  | 6.2044   | 4.6987   | 10.8642  |
| hsa-miR-422a   | -13.3543 | 4.1892   | 5.7727  | 0.893    | 6.1987   | 4.1188   | 3.9655   | 1.4732   |
| hsa-miR-422b   | 3.591    | 10.4239  | 11.3589 | -1.7087  | 0.7526   | -0.6496  | -1.0343  | -2.8076  |
| hsa-miR-423    | -0.7577  | 13.7639  | 3.5302  | -5.6133  | -0.9733  | -0.704   | -3.3943  | -4.5821  |
| hsa-miR-424    | -0.6685  | -0.4269  | 15.4059 | -4.0839  | -0.193   | -0.3676  | -1.6953  | -4.4599  |
| hsa-miR-425    | -0.6497  | -0.8073  | 0.7539  | -11.5792 | -0.0624  | -1.3024  | -2.6237  | -3.3679  |
| hsa-miR-429    | 5.7816   | 5.61     | 6.4017  | 3.4765   | 10.0526  | 4.3472   | 3.364    | 1.6309   |
| hsa-miR-432    | -0.3409  | 11.7721  | 6.1537  | 10.3946  | 10.1462  | 1.0336   | 0.9916   | 4.0029   |
| hsa-miR-433    | 8.5233   | 7.001    | 7.5263  | 4.1146   | 5.9726   | 3.8218   | 3.4203   | 3.5084   |
| hsa-miR-449    | 10.448   | 11.7319  | 8.6597  | 4.6424   | 8.5582   | 8.154    | 3.1567   | 4.559    |
| hsa-miR-450    | 2.6208   | 2.9084   | 3.3918  | -0.0275  | 4.8302   | 1.9161   | 0.8692   | -0.0668  |
| hsa-miR-451    | -3.9844  | -5.8154  | -3.2726 | -14.0495 | -10.1588 | -3.7485  | -10.4376 | -14.4115 |
| hsa-miR-452    | 4.4884   | 7.9955   | 6.8941  | 2.4911   | 5.4477   | 8.825    | 8.0156   | 3.1597   |
| hsa-miR-485-5p | 8.4511   | 8.0408   | 7.6478  | 3.872    | 6.1683   | 5.6412   | 4.4299   | 4.4731   |
| hsa-miR-489    | 13.6244  | 13.7639  | 9.9635  | 4.9616   | 15.787   | 10.8463  | 12.6281  | 10.8642  |
| hsa-miR-490    | 9.5189   | 5.6944   | 8.3019  | 7.1747   | 6.9545   | 4.3671   | -0.2973  | 0.7704   |
| hsa-miR-491    | 2.51     | 1.2975   | 2.0027  | -3.5007  | 4.0275   | 0.1127   | 1.358    | -1.6809  |
| hsa-miR-494    | 8.2609   | 10.3186  | 6.6304  | 4.5942   | 4.5894   | 3.8762   | 3.7144   | 4.4236   |
| hsa-miR-496    | 13.8948  | 13.7639  | 11.2502 | 8.7353   | 12.1133  | 5.9854   | 4.2158   | 5.8072   |
| hsa-miR-497    | 3.6352   | 6.7905   | 4.9789  | 1.4443   | 5.9012   | 3.1164   | -2.1747  | 0.1442   |
| hsa-miR-500    | 4.6811   | 8.4598   | -18.024 | 1.7606   | 5.5184   | 3.0037   | 3.7777   | 1.4266   |
| hsa-miR-501    | 4.3366   | 5.7213   | 5.9865  | -0.0746  | 4.4736   | 2.6986   | 1.7492   | 0.9714   |
| hsa-miR-502    | 5.8496   | 10.1176  | 11.7265 | 2.3709   | 5.8237   | 3.56     | 3.8184   | 3.1328   |
| hsa-miR-505    | -0.2722  | 13.7639  | 15.4059 | -2.5153  | 1.5826   | -0.7421  | -2.0161  | -3.2189  |
| hsa-miR-506    | 13.8948  | 13.7639  | 15.4059 | 10.5201  | 10.8834  | 12.2073  | 7.4919   | 10.8642  |
| hsa-miR-508    | 13.8948  | 13.7639  | 15.4059 | 4.7883   | 9.2934   | 13.8023  | 6.3129   | 3.9973   |
| hsa-miR-509    | 10.9874  | 13.0466  | 9.3647  | 5.8754   | 7.4296   | 7.921    | 6.2981   | 4.7996   |
| hsa-miR-510    | 10.7898  | 11.2268  | 11.5965 | 8.9684   | 10.2142  | 11.6737  | 12.1289  | 10.8642  |

|                |          |          |          |          |         |         |         |          |
|----------------|----------|----------|----------|----------|---------|---------|---------|----------|
| hsa-miR-511    | 8.4207   | 13.7639  | 8.8702   | 4.4744   | 8.3376  | 9.0623  | 12.6281 | 10.8642  |
| hsa-miR-512-5p | 10.9253  | 13.7639  | 14.0855  | 7.8107   | 9.6577  | 9.1636  | 10.596  | 10.0045  |
| hsa-miR-513    | 13.8948  | 13.7639  | 15.4059  | 11.8328  | 11.9976 | 13.8023 | 12.6281 | 10.8642  |
| hsa-miR-514    | 11.4358  | 13.7639  | 10.6326  | 6.9426   | 10.9036 | 9.086   | 5.9554  | 3.5564   |
| hsa-miR-515-3p | 11.2334  | 11.3662  | 10.2692  | 8.7228   | 8.2152  | 9.6969  | 8.0401  | 9.0659   |
| hsa-miR-515-5p | 13.8948  | 13.7639  | -21.1384 | -11.3685 | 15.787  | 13.8023 | 11.6651 | 10.8642  |
| hsa-miR-516-3p | 5.4259   | 5.5799   | 7.158    | 3.5903   | 7.9903  | 6.3718  | 6.5802  | 3.0712   |
| hsa-miR-517a   | 13.8948  | 13.7639  | -20.0104 | -17.6634 | 12.7143 | 13.2993 | 12.6281 | 10.8642  |
| hsa-miR-517b   | 13.8948  | 13.7639  | 13.255   | 11.8328  | 12.4408 | 13.8023 | 12.6281 | 10.8642  |
| hsa-miR-517c   | 13.8948  | 13.7639  | 15.4059  | 6.8863   | 10.9991 | 13.8023 | 9.6853  | 10.8642  |
| hsa-miR-518a   | 8.4994   | 13.7639  | 14.0581  | 8.3001   | 9.827   | 8.8025  | 8.3952  | 7.1447   |
| hsa-miR-518b   | 4.2038   | 5.4889   | 5.581    | 1.0821   | 4.7752  | 6.5236  | 7.6729  | 1.6836   |
| hsa-miR-518c   | 11.8678  | 11.1472  | 15.4059  | 9.9809   | 11.4779 | 11.61   | 11.3622 | 8.7229   |
| hsa-miR-518d   | 8.9405   | 13.7639  | 15.0175  | 7.5822   | 8.4317  | 9.8782  | 7.7075  | 6.8455   |
| hsa-miR-518e   | 13.8101  | 11.5727  | 11.7521  | 10.2599  | 8.9221  | 7.9072  | 8.6281  | 7.9346   |
| hsa-miR-519b   | 13.8948  | 13.7639  | 15.4059  | 11.8328  | 15.787  | 13.8023 | 12.6281 | 10.8642  |
| hsa-miR-519c   | 9.0418   | 13.7639  | 14.6571  | 9.6598   | 12.1378 | 10.3403 | 11.4539 | 8.2154   |
| hsa-miR-519d   | 9.9983   | 11.6882  | 12.483   | 6.5422   | 7.6534  | 8.7271  | 7.401   | 7.0675   |
| hsa-miR-519e   | 8.6473   | 13.7639  | 9.5963   | 8.5727   | 7.8408  | 7.5929  | 10.4548 | -13.8244 |
| hsa-miR-520a   | 13.8948  | 13.7639  | 13.4149  | 7.1854   | 8.5836  | 10.1683 | 11.5044 | 6.8642   |
| hsa-miR-520b   | 13.8948  | 13.7639  | 12.9271  | 8.9097   | 6.4162  | 11.0214 | 10.4481 | 7.8847   |
| hsa-miR-520c   | 13.8948  | 13.7639  | 12.5931  | 8.5487   | 12.4226 | 10.9877 | 12.6281 | 8.9787   |
| hsa-miR-520d   | 13.8948  | 13.7639  | 7.3446   | 8.1771   | 10.2002 | 13.0151 | 11.8095 | 10.8642  |
| hsa-miR-520e   | 13.8948  | -9.5494  | 15.4059  | -15.2768 | 15.787  | 13.8023 | 12.6281 | 10.8642  |
| hsa-miR-520f   | -10.9124 | 13.7639  | 15.4059  | 7.8328   | 11.0708 | 7.8172  | 12.449  | 10.037   |
| hsa-miR-520g   | 13.8948  | -10.3076 | -14.5941 | 11.8328  | 13.222  | 13.8023 | 12.6281 | 0.5475   |
| hsa-miR-520h   | 13.8948  | 13.7639  | 15.4059  | 10.811   | 9.8531  | 9.8023  | 12.6281 | 10.8642  |
| hsa-miR-521    | 13.8948  | 13.7639  | 15.4059  | 11.8328  | 13.3526 | 13.7002 | 12.6281 | 10.8642  |
| hsa-miR-522    | 13.8948  | -14.2361 | 15.4059  | 11.8328  | 11.787  | 13.8023 | 11.1914 | 10.8642  |
| hsa-miR-523    | -15.1052 | -14.5719 | 14.0911  | 11.8328  | 15.1398 | 13.8023 | 12.6281 | 10.8642  |
| hsa-miR-526a   | 13.8948  | 13.7639  | 15.4059  | 8.4996   | 11.6769 | 13.8023 | -7.579  | 7.4828   |
| hsa-miR-526b   | -11.6906 | 13.7639  | 15.4059  | -9.781   | 14.8718 | 13.16   | 12.6281 | 10.8642  |
